# Supplementary material for: Laboratory In-Situ Production of Autochthonous and Allochthonous Fluorescent Organic Matter by Freshwater Bacteria
Source: MDPI journal article supplement (doi:10.3390/microorganisms9081623), 2021-07-29

## Supplementary Material

**Table S1.** Table of data for the physicochemical parameters for the environmental freshwater sample used to obtain both the environmental community and bacterial isolates. The freshwater sample was collected on 01/06/2017 at 13:55 BST. The table shows data collected via an *in situ* water quality sensor (Eureka Manta 2, RS Hydro, UK) and data from an accredited off-site laboratory (UK accredited laboratory, ISO 17025 (2005)).

|                                             | <b><u>Parameter</u></b>        | <b><u>Unit</u></b>   | <b><u>Value</u></b> |
|---------------------------------------------|--------------------------------|----------------------|---------------------|
| <b><u>In situ sensor data</u></b>           | Temperature                    | (°C)                 | 18.3                |
|                                             | pH                             |                      | 7.89                |
|                                             | Dissolved Oxygen               | (mg/L)               | 6.61                |
|                                             | Conductivity                   | (µS/cm)              | 595.9               |
| <b><u>UK accredited laboratory data</u></b> | pH                             |                      | 7.9                 |
|                                             | Conductivity                   | (µS/cm @ 20°C)       | 537                 |
|                                             | Turbidity                      | NTU                  | 44                  |
|                                             | Colour (spectrophotometer)     |                      | 7                   |
|                                             | Nitrate (calculated)           | mg/L NO <sub>3</sub> | 4.7                 |
|                                             | Nitrite                        | mg/L NO <sub>2</sub> | 0.149               |
|                                             | Orthophosphate                 | mg/L P               | 0.63                |
|                                             | Sulphate                       | mg/L                 | 96                  |
|                                             | Chloride                       | mg/L                 | 43                  |
|                                             | 2 day plate count @ 37         | cfu/mL               | 6700                |
|                                             | 3 day plate count @ 22         | cfu/mL               | 13400               |
|                                             | Total coliforms                | cfu/100 mL           | 860                 |
|                                             | <i>E. coli</i>                 | cfu/100 mL           | 270                 |
|                                             | <i>Clostridium perfringens</i> | cfu/100 mL           | 340                 |
|                                             | <i>Enterococci</i>             | cfu/100 mL           | 120                 |
|                                             | <i>P. aeruginosa</i>           | cfu/100 mL           | 1000                |

**Figure S1.** Enumeration normalised excitation-emission matrices of the supernatant sample fraction of the 24-hour environmentally-sourced monoculture samples. Samples were incubated at 30°C. Colour bars are quinine sulphate units,  $\log_{10}$  QSU per cfu mL<sup>-1</sup>, where 1 QSU = 1  $\mu\text{g L}^{-1}$  quinine sulphate. Fluorescence peaks identified from the environmental isolate bacterial cultures are labelled and described in Table 1.

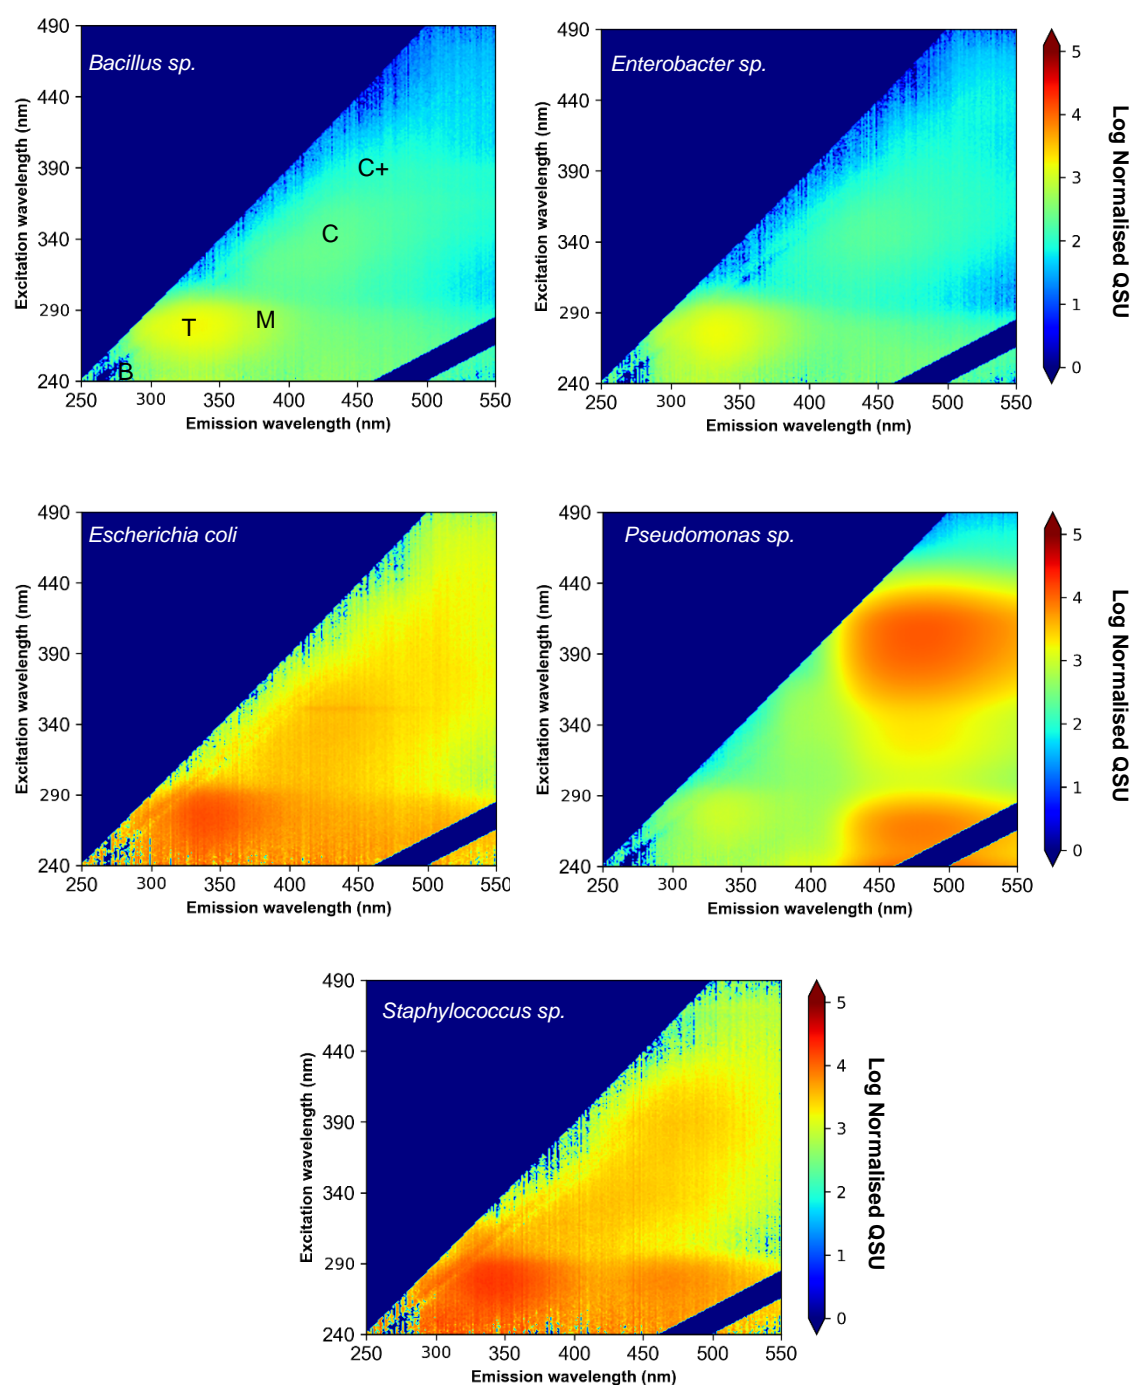

**Figure S2.** Enumeration normalised excitation-emission matrices of the resuspended cells sample fraction of the 24-hour environmentally-sourced monoculture samples. Samples were incubated at 30°C. Colour bars are quinine sulphate units,  $\log_{10}$  QSU per cfu mL<sup>-1</sup>, where 1 QSU = 1  $\mu\text{g L}^{-1}$  quinine sulphate. Fluorescence peaks identified from the environmental isolate bacterial cultures are labelled and described in Table 1.

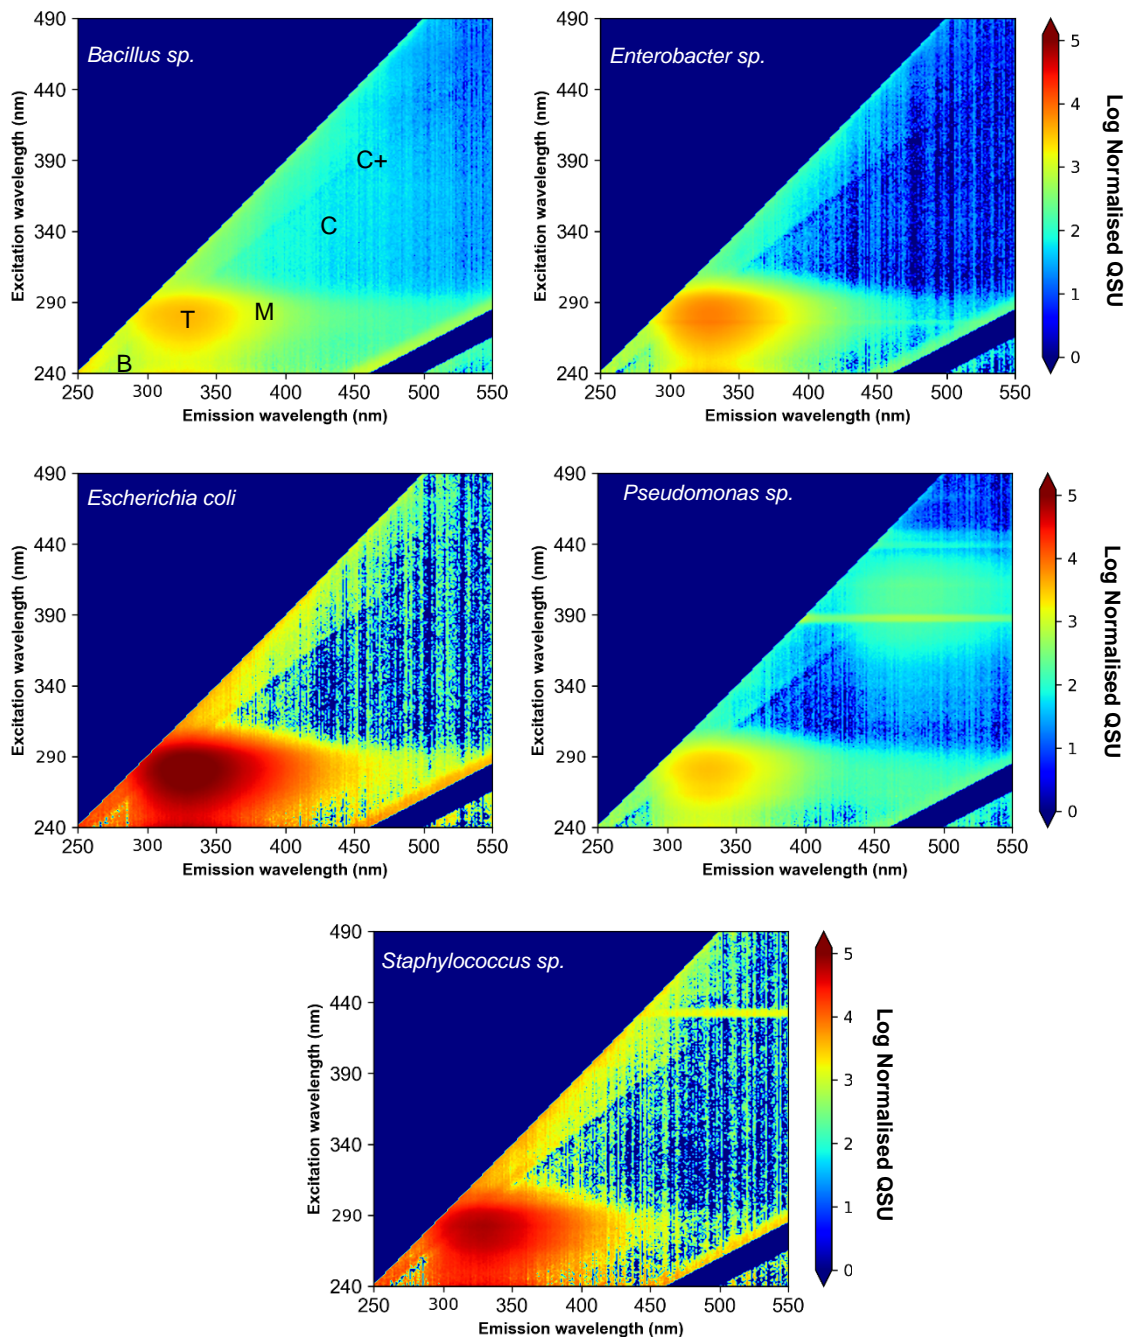

**Figure S3.** Enumeration normalised excitation-emission matrices of the lysed cells sample fraction of the 24-hour environmentally-sourced monoculture samples. Samples were incubated at 30°C. Colour bars are quinine sulphate units,  $\log_{10}$ QSU per cfu mL<sup>-1</sup>, where 1 QSU = 1  $\mu$ g L<sup>-1</sup> quinine sulphate. Fluorescence peaks identified from the environmental isolate bacterial cultures are labelled and described in Table 1.

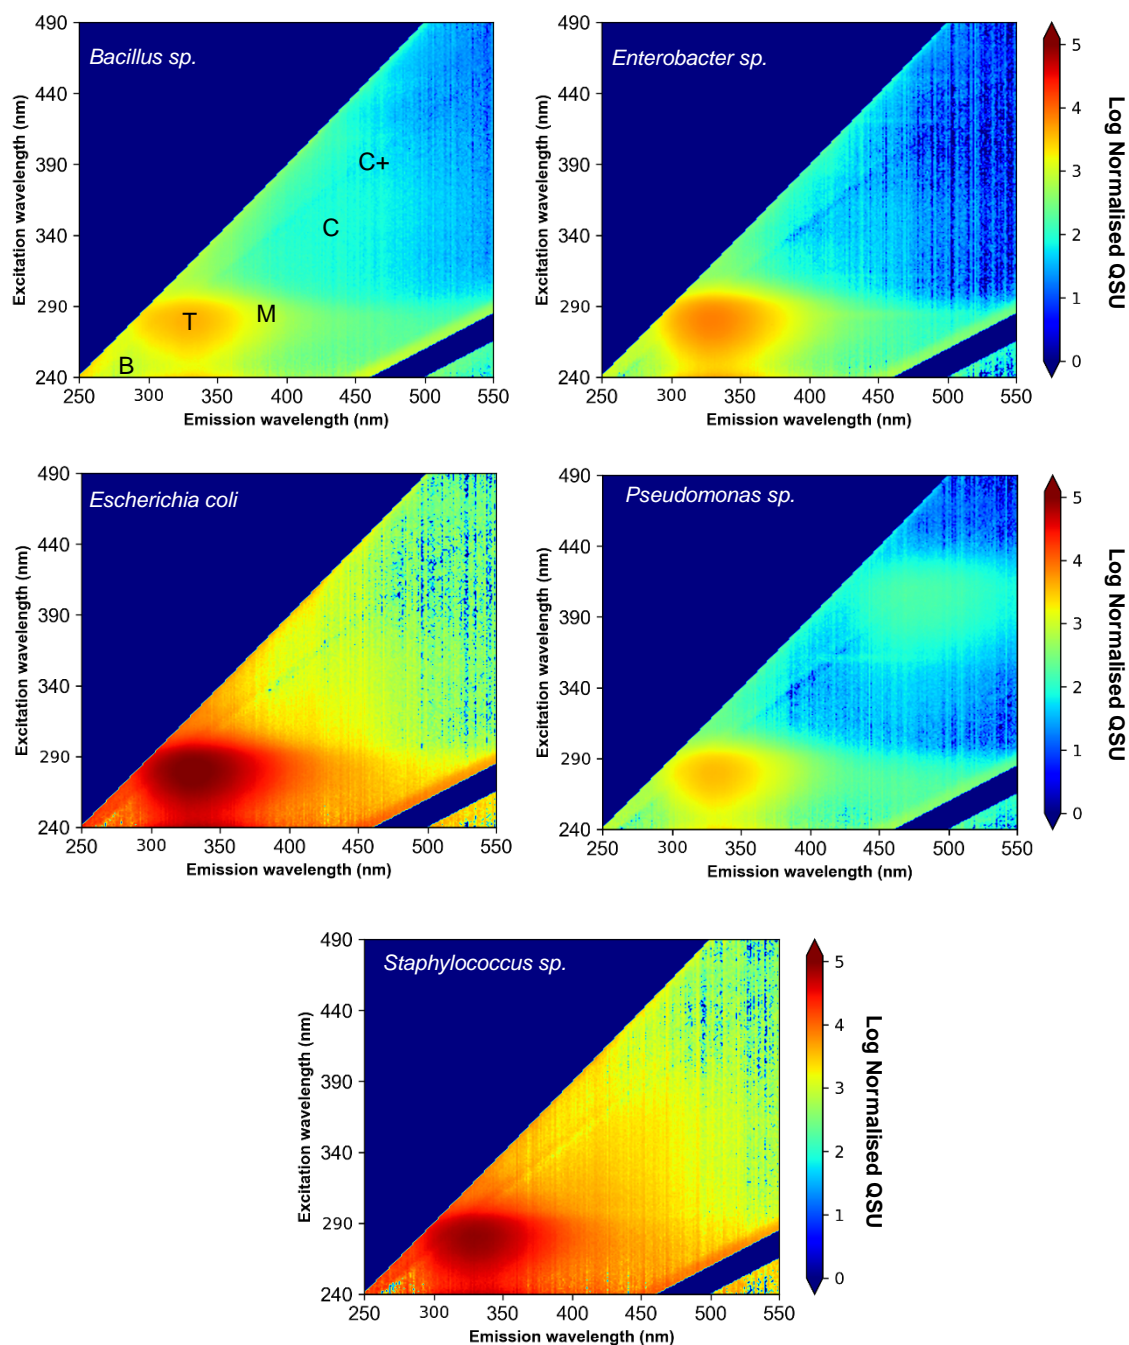

Supplement: s1 [file s1]
